# Supplementary material for: Investigation of Steam Explosion Pretreatment of Sawdust and Oat Straw to Improve Their Quality as Biofuel Pellets
Source: MDPI journal article supplement (doi:10.3390/en15197168), 2022-09-29
Supplement: s1 [file s1]

Archive with 1 entries (1 files):
- energies-1899609-supplementary.pdf
