# Supplementary material for: Investigation of Steam Explosion Pretreatment of Sawdust and Oat Straw to Improve Their Quality as Biofuel Pellets
Source: MDPI journal article supplement (doi:10.3390/en15197168), 2022-09-29
Supplement: s1 [file s1 › energies-1899609-supplementary.pdf]

# Investigation of Steam Explosion Pretreatment of Sawdust and Oat Straw to Improve Their Quality as Biofuel Pellet

**Chukwuka Onyenwoke<sup>1,\*</sup>, Lope G. Tabil<sup>1,\*</sup>, Tim Dumonceaux<sup>2</sup>, Edmund Mupondwa<sup>1,2</sup>, Duncan Cree<sup>3</sup>, Phani Adapa<sup>4</sup>, and Chithra Karunakaran<sup>5</sup>**

<sup>1</sup> Department of Chemical and Biological Engineering, University of Saskatchewan, 57 Campus Drive, Saskatoon, SK S7N 5A9, Canada

<sup>2</sup> Agriculture and Agri-Food Canada, Saskatoon Research Centre, 107 Science Place, Saskatoon, SK S7N 0X2, Canada

<sup>3</sup> Department of Mechanical Engineering, University of Saskatchewan, 57 Campus Drive, Saskatoon, SK S7N 5A9, Canada

<sup>4</sup> National Hydrology Research Centre, Global Institute for Water Security (GIWS), University of Saskatchewan, 11 Innovation Boulevard, Saskatoon, SK S7N 3H5, Canada

<sup>5</sup> Canadian Light Source Inc., 44 Innovation Boulevard, Saskatoon, SK S7N 2V3, Canada

\* Correspondence: oac059@usask.ca (C.A.O.); lope.tabil@usask.ca (L.G.T.).

## Supplementary Data

Table S1. Severity factor of the steam explosion pretreatment used in the experiments.

| Temp (°) | time (min) | severity factor |
|----------|------------|-----------------|
| 160      | 5          | 2.47            |
| 160      | 7          | 2.61            |
| 160      | 9          | 2.72            |
| 180      | 5          | 3.05            |
| 180      | 7          | 3.2             |
| 180      | 9          | 3.31            |
| 200      | 5          | 3.64            |
| 200      | 7          | 3.79            |
| 200      | 9          | 3.90            |

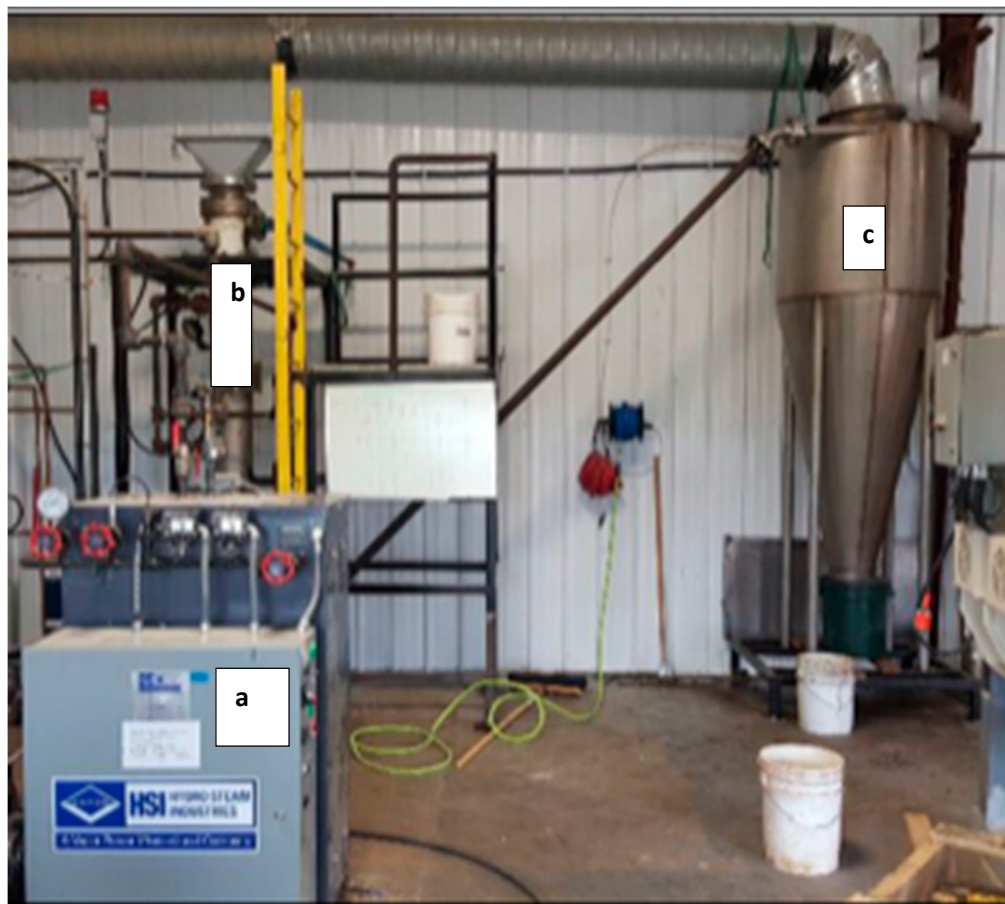

Figure S1. Photographs of the steam explosion system used in the experiments.  
(a) steam generator; (b) pressure vessel (chamber); (c) cyclone
